# Supplementary material for: Development of a distributed hybrid seismic-electrical data acquisition system based on NB-IoT technology
Source: Copernicus journal article supplement (doi:10.5194/gi-2018-51), 2019-04-29
Supplement: Supplementary file [file gi-2018-51-RC1-supplement.pdf]

The idea of this manuscript is original and unique, and it describes the technical realization of a new distributed data acquisition system for geophysical exploration. This is the first time I have seen the application of NB-IoT technology in geophysical instruments. I firmly believe that the results obtained in this study will drive the advancement of prospective integrated seismic-electrical technologies and promote the use of IoT technologies in geophysical instruments. The findings of this study are very suitable for the GI journal.

The quality of the figures in this manuscript is good. I have attached below several comments arising from the manuscript, which might be helpful to further improve the quality of the publication of the paper.

(1)The format of some of the references should be properly adjusted to ensure that the article format is more standardized.

(2)The Figure 3 “Circuit diagram of the AD driver” may not be needed because the circuit is not complicated, and it has been clearly expressed in words.

(3)A final checking for any missed spelling errors may be necessary.

Since the manuscript is left hanging for quite some time this process should come to an end and the paper finally being published. I am looking forward to the final publication.
